# Supplementary material
Source: publisher figshare collection journal article supplement (https://aacr.figshare.com/articles/dataset/_/22353777)
Supplement: Supplementary file 1 [file 39778302]

Figure S1. Information on treatment and available testing results for analysis
